# Supplementary material for: Proteomics and the search for welfare and stress biomarkers in animal production in the one-health context
Source: Royal Society of Chemistry journal article supplement (doi:10.1039/c5mb00788g), 2016-02-18
Supplement: c5mb00788g2.pdf [file c5mb00788g2.pdf]

**Supplementary Table S2.** Summary of proteomic studies related to stress in porcine.

| Condition              | Sample                 | Technique         | Main identified proteins                                                          | References |
|------------------------|------------------------|-------------------|-----------------------------------------------------------------------------------|------------|
| Space allowance        | Serum                  | DIGE<br>MALDI-TOF | $\beta$ -actin                                                                    | 33         |
| Individual confinement | Serum                  | DIGE<br>MALDI-TOF | Acute phase proteins<br>Lipid metabolism,<br>Oxidative stress                     | 34         |
| Individual confinement | Serum                  | iTRAQ             | Immune system,<br>Lipid metabolism,<br>Oxidative stress<br>Cellular/tissue damage | 34         |
| Ryr1 mutation          | Semimembranosus muscle | 2DE               | GAPDH<br>Oxidative metabolism<br>Repair capacities<br>HSP72<br>HSP27              | 36         |
| Acute stress           | Saliva                 | 2DE<br>LC-MS/MS   | Albumin<br>Odorant-binding protein                                                | 38         |
