# Supplementary material for: Proteomics and the search for welfare and stress biomarkers in animal production in the one-health context
Source: Royal Society of Chemistry journal article supplement (doi:10.1039/c5mb00788g), 2016-02-18
Supplement: c5mb00788g3.pdf [file c5mb00788g3.pdf]

**Supplementary Table S3.** Proteomic studies and seasonal weight loss (SWL) induced stress

| Condition                           | Sample          | Technique                       | Main identified proteins                                                                                                                                                                                             | Ref |
|-------------------------------------|-----------------|---------------------------------|----------------------------------------------------------------------------------------------------------------------------------------------------------------------------------------------------------------------|-----|
| SWL in two rabbit breeds            | Skeletal muscle | 2DE                             | L-Lactate Dehydrogenase, adenylate kinase, glyceraldehyde 3-phosphate dehydrogenase                                                                                                                                  | 58  |
| SWL in three sheep breeds           | Skeletal muscle | 2DE                             | Histidine triad nucleotide binding protein, desmin, phosphoglucomutase-1                                                                                                                                             | 67  |
| SWL in three sheep breeds           | Liver           | 2DE                             | Glutathione S-transferase, Phosphoglycerate mutase, HSP (Heat Shock protein) like stress protein;                                                                                                                    | 68  |
| SWL in three sheep breeds           | Skeletal muscle | Label free / shotgun proteomics | Apolipoprotein A-IV, ferritin heavy polypeptide 1, Serpin peptide inhibitor clade H member 1                                                                                                                         | 69  |
| SWL in merino sheep                 | Wool            | iTRAQ / Shotgun proteomics      | High Sulphur protein KAP13.1 and KAP6 family (High Glycine-tyrosine protein)                                                                                                                                         | 70  |
| SWL in lactating in two goat breeds | Mammary gland   | 2DE and BN-PAGE                 | NADH-ubiquinone oxidoreductase 75 kDa subunit, lamin B1 mitochondrial, Guanine nucleotide-binding protein G(I)/G(S)/G(T) subunit beta-2, cytochrome b-c1 complex subunit 1, Bovine F1-C8 Sub-Complex Of Atp Synthase | 71  |
