# Supplementary material for: Proteomics and the search for welfare and stress biomarkers in animal production in the one-health context
Source: Royal Society of Chemistry journal article supplement (doi:10.1039/c5mb00788g), 2016-02-18
Supplement: c5mb00788g4.pdf [file c5mb00788g4.pdf]

**Supplementary Table S4.** Proteomic studies and stress in poultry

| <b>Condition</b>                          | <b>Sample</b>   | <b>Technique</b> | <b>Main identified proteins</b>                                                                                       | <b>Ref</b> |
|-------------------------------------------|-----------------|------------------|-----------------------------------------------------------------------------------------------------------------------|------------|
| Effect of restraint in chickens           | Skeletal muscle | 2DE              | 25 different proteins, majority involved in the glycolytic pathway and cell structure roles                           | 73         |
| Heat stress in ducks (Peking and Muscovy) | Liver           | 2DE              | Heat shock protein (HSP) 70, HSP10, $\alpha$ -enolase and S-adenosylmethionine synthase                               | 74         |
| Acute heat stress in male roosters        | Testis          | 2DE - DIGE       | Glutathione S-transferase, transgelin, DJ-1, HSP, Chaperonins, Proteasome subunits                                    | 75         |
| Steatosis in ducks (foie gras production) | Liver           | 2DE              | Eukariotic initiation factor, Tubulin $\beta$ chain, DJ-1, Fatty Acid synthase, Annexin, Regucalcin, sulfotransferase | 78         |
